# Supplementary material for: Prevalence, intensity and factors associated with soil-transmitted helminths infections among preschool-age children in Hoima district, rural western Uganda
Source: BMC Infect Dis. 2018 Aug 17;18:408. doi: 10.1186/s12879-018-3289-0 (PMC6098587; doi:10.1186/s12879-018-3289-0)
Supplement: Supplementary file 3 — Contains data used to draw conclusions. (XLSX 67 kb) [file 12879_2018_3289_MOESM3_ESM.xlsx]

## Sheet: Sheet1
Child_gender	Age_of_child	Child_age_group	Presence_of_infection	Hookworm_Infection	Number_of _Hookworm_eggs	Ascaris_Infection	Number_of_Ascaris_eggs	Trichiura_Infection	Number_of_Trichiura_eggs	Hookworm_intensity	Hookworm_intensity_category	Ascaris_intensity	Ascaris_intensity_category	Trichura_intensity	Trichuris_intensity_category	Handwashing_with_soap_after_defecation	Child_has_ever_eaten_unwashed fruits	Child_ever_eaten_raw_vegetables	Disposal_of_child's_faeces	Child_dewormed_in_Oct
Male	2	>=1 &<3	0	No	0	No	0	No	0	0	0	0	0	0	0	Rarely/sometimes	Sometimes	Sometimes	Sanitary	Yes
Male	3	>=3 & <5	1	Yes	15	No	0	No	0	360	1-1999epg	0	0	0	0	Often/always	Sometimes	Sometimes	Sanitary	Yes
Male	2	>=1 &<3	0	No	0	No	0	No	0	0	0	0	0	0	0	Often/always	Sometimes	Sometimes	Sanitary	No
Female	5	>4	0	No	0	No	0	No	0	0	0	0	0	0	0	Rarely/sometimes	Often times	Sometimes	Sanitary	Yes
Male	2	>=1 &<3	1	Yes	3	No	0	No	0	72	1-1999epg	0	0	0	0	Rarely/sometimes	Often times	Sometimes	Sanitary	No
Female	3	>=3 & <5	0	No	0	No	0	No	0	0	0	0	0	0	0	Often/always	Often times	Sometimes	Sanitary	Yes
Male	1	>=1 &<3	0	No	0	No	0	No	0	0	0	0	0	0	0	Rarely/sometimes	Not at all	Sometimes	Sanitary	No
Female	3	>=3 & <5	0	No	0	No	0	No	0	0	0	0	0	0	0	Rarely/sometimes	Not at all	Often times	Sanitary	Yes
Female	5	>4	1	Yes	19	No	0	No	0	456	1-1999epg	0	0	0	0	Often/always	Sometimes	Sometimes	Sanitary	Yes
Male	1	>=1 &<3	0	No	0	No	0	No	0	0	0	0	0	0	0	Often/always	Sometimes	Often times	Sanitary	Yes
Female	5	>4	1	No	0	Yes	7	No	0	0	0	168	1-4999epg	0	0	Rarely/sometimes	Sometimes	Sometimes	Sanitary	Yes
Female	3	>=3 & <5	1	Yes	5	No	0	No	0	120	1-1999epg	0	0	0	0	Rarely/sometimes	Not at all	Sometimes	Sanitary	Yes
Female	1	>=1 &<3	0	No	0	No	0	No	0	0	0	0	0	0	0	Often/always	Sometimes	Sometimes	Sanitary	Yes
Female	1	>=1 &<3	0	No	0	No	0	No	0	0	0	0	0	0	0	Often/always	Often times	Often times	Sanitary	No
Female	2	>=1 &<3	0	No	0	No	0	No	0	0	0	0	0	0	0	Often/always	Sometimes	Sometimes	Sanitary	No
Female	3	>=3 & <5	0	No	0	No	0	No	0	0	0	0	0	0	0	Often/always	Often times	Sometimes	Sanitary	Yes
Female	4	>=3 & <5	1	Yes	9	No	0	No	0	216	1-1999epg	0	0	0	0	Often/always	Not at all	Sometimes	Sanitary	No
Female	4	>=3 & <5	0	No	0	No	0	No	0	0	0	0	0	0	0	Often/always	Not at all	Sometimes	Sanitary	Yes
Female	5	>4	1	No	0	Yes	9	No	0	0	0	216	1-4999epg	0	0	Rarely/sometimes	Often times	Sometimes	Sanitary	Yes
Female	4	>=3 & <5	0	No	0	No	0	No	0	0	0	0	0	0	0	Often/always	Often times	Sometimes	Sanitary	Yes
Female	5	>4	0	No	0	No	0	No	0	0	0	0	0	0	0	Often/always	Sometimes	Not at all	Sanitary	No
Male	2	>=1 &<3	0	No	0	No	0	No	0	0	0	0	0	0	0	Often/always	Sometimes	Sometimes	Sanitary	Yes
Female	1	>=1 &<3	1	Yes	105	Yes	43	No	0	2520	2000-3999epg	1032	1-4999epg	0	0	Rarely/sometimes	Sometimes	Sometimes	Unsanitary	Yes
Male	4	>=3 & <5	0	No	0	No	0	No	0	0	0	0	0	0	0	Often/always	Sometimes	Sometimes	Sanitary	No
Male	4	>=3 & <5	1	Yes	9	No	0	No	0	216	1-1999epg	0	0	0	0	Often/always	Sometimes	Sometimes	Sanitary	Yes
Female	3	>=3 & <5	0	No	0	No	0	No	0	0	0	0	0	0	0	Often/always	Often times	Often times	Sanitary	Yes
Female	4	>=3 & <5	0	No	0	No	0	No	0	0	0	0	0	0	0	Often/always	Sometimes	Often times	Sanitary	No
Female	5	>4	0	No	0	No	0	No	0	0	0	0	0	0	0	Often/always	Often times	Often times	Sanitary	Yes
Female	3	>=3 & <5	0	No	0	No	0	No	0	0	0	0	0	0	0	Often/always	Sometimes	Not at all	Sanitary	Yes
Female	1	>=1 &<3	0	No	0	No	0	No	0	0	0	0	0	0	0	Often/always	Sometimes	Often times	Sanitary	No
Female	3	>=3 & <5	0	No	0	No	0	No	0	0	0	0	0	0	0	Often/always	Often times	Often times	Sanitary	Yes
Male	4	>=3 & <5	0	No	0	No	0	No	0	0	0	0	0	0	0	Often/always	Often times	Often times	Sanitary	Yes
Male	5	>4	1	No	0	No	0	No	0	0	1-1999epg	0	0	0	0	Rarely/sometimes	Not at all	Often times	Sanitary	Yes
Male	5	>4	0	No	0	No	0	No	0	0	0	0	0	0	0	Rarely/sometimes	Not at all	Not at all	Sanitary	Yes
Female	5	>4	0	No	0	No	0	No	0	0	0	0	0	0	0	Rarely/sometimes	Sometimes	Sometimes	Unsanitary	No
Female	3	>=3 & <5	0	No	0	No	0	No	0	0	0	0	0	0	0	Rarely/sometimes	Not at all	Sometimes	Sanitary	Yes
Female	4	>=3 & <5	0	No	0	No	0	No	0	0	0	0	0	0	0	Rarely/sometimes	Sometimes	Often times	Sanitary	Yes
Female	2	>=1 &<3	0	No	0	No	0	No	0	0	0	0	0	0	0	Rarely/sometimes	Sometimes	Sometimes	Unsanitary	No
Male	3	>=3 & <5	0	No	0	No	0	No	0	0	0	0	0	0	0	Rarely/sometimes	Often times	Often times	Sanitary	Yes
Female	5	>4	0	No	0	No	0	No	0	0	0	0	0	0	0	Rarely/sometimes	Sometimes	Often times	Sanitary	No
Male	4	>=3 & <5	0	No	0	No	0	No	0	0	0	0	0	0	0	Rarely/sometimes	Sometimes	Often times	Unsanitary	No
Female	5	>4	0	No	0	No	0	No	0	0	1-1999epg	0	0	0	0	Rarely/sometimes	Often times	Often times	Unsanitary	Yes
Female	3	>=3 & <5	0	No	0	No	0	No	0	0	0	0	0	0	0	Rarely/sometimes	Often times	Often times	Sanitary	No
Male	4	>=3 & <5	1	No	0	Yes	11	No	0	0	0	264	1-4999epg	0	0	Rarely/sometimes	Sometimes	Sometimes	Sanitary	Yes
Female	1	>=1 &<3	0	No	0	No	0	No	0	0	0	0	0	0	0	Rarely/sometimes	Often times	Sometimes	Sanitary	Yes
Female	3	>=3 & <5	0	No	0	No	0	No	0	0	0	0	0	0	0	Often/always	Sometimes	Often times	Sanitary	Yes
Male	5	>4	1	Yes	13	No	0	No	0	312	1-1999epg	0	0	0	0	Rarely/sometimes	Often times	Often times	Sanitary	No
Female	4	>=3 & <5	0	No	0	No	0	No	0	0	0	0	0	0	0	Often/always	Sometimes	Sometimes	Sanitary	No
Female	4	>=3 & <5	0	No	0	No	0	No	0	0	0	0	0	0	0	Often/always	Sometimes	Often times	Sanitary	Yes
Male	4	>=3 & <5	0	No	0	No	0	No	0	0	0	0	0	0	0	Rarely/sometimes	Often times	Sometimes	Sanitary	Yes
Male	5	>4	1	Yes	89	Yes	7	No	0	2136	2000-3999epg	168	1-4999epg	0	0	Often/always	Sometimes	Sometimes	Unsanitary	No
Female	2	>=1 &<3	0	No	0	No	0	No	0	0	0	0	0	0	0	Often/always	Often times	Sometimes	Sanitary	Yes
Male	2	>=1 &<3	1	No	0	Yes	11	No	0	0	1-1999epg	264	1-4999epg	0	0	Rarely/sometimes	Often times	Sometimes	Sanitary	Yes
Male	4	>=3 & <5	0	No	0	No	0	No	0	0	0	0	0	0	0	Often/always	Often times	Often times	Sanitary	No
Female	4	>=3 & <5	0	No	0	No	0	No	0	0	0	0	0	0	0	Often/always	Often times	Sometimes	Sanitary	Yes
Male	1	>=1 &<3	0	No	0	No	0	No	0	0	0	0	0	0	0	Often/always	Not at all	Sometimes	Sanitary	No
Male	2	>=1 &<3	0	No	0	No	0	No	0	0	0	0	0	0	0	Rarely/sometimes	Often times	Sometimes	Sanitary	Yes
Male	5	>4	1	Yes	2	No	0	No	0	48	1-1999epg	0	0	0	0	Rarely/sometimes	Often times	Sometimes	Sanitary	Yes
Male	2	>=1 &<3	0	No	0	No	0	No	0	0	0	0	0	0	0	Rarely/sometimes	Sometimes	Not at all	Sanitary	Yes
Male	1	>=1 &<3	0	No	0	No	0	No	0	0	0	0	0	0	0	Rarely/sometimes	Sometimes	Sometimes	Sanitary	No
Female	2	>=1 &<3	0	No	0	No	0	No	0	0	0	0	0	0	0	Rarely/sometimes	Often times	Often times	Sanitary	Yes
Female	2	>=1 &<3	0	No	0	No	0	No	0	0	0	0	0	0	0	Rarely/sometimes	Often times	Sometimes	Sanitary	Yes
Male	1	>=1 &<3	0	No	0	No	0	No	0	0	0	0	0	0	0	Often/always	Sometimes	Sometimes	Sanitary	No
Male	3	>=3 & <5	0	No	0	No	0	No	0	0	0	0	0	0	0	Rarely/sometimes	Often times	Often times	Sanitary	Yes
Male	4	>=3 & <5	0	No	0	No	0	No	0	0	0	0	0	0	0	Rarely/sometimes	Sometimes	Not at all	Sanitary	Yes
Female	3	>=3 & <5	1	Yes	14	No	0	No	0	336	1-1999epg	0	0	0	0	Rarely/sometimes	Sometimes	Sometimes	Sanitary	No
Female	4	>=3 & <5	0	No	0	No	0	No	0	0	0	0	0	0	0	Often/always	Often times	Often times	Sanitary	Yes
Female	2	>=1 &<3	0	No	0	No	0	No	0	0	0	0	0	0	0	Rarely/sometimes	Sometimes	Often times	Sanitary	Yes
Female	3	>=3 & <5	0	No	0	No	0	No	0	0	0	0	0	0	0	Often/always	Often times	Often times	Sanitary	Yes
Male	1	>=1 &<3	0	No	0	No	0	No	0	0	0	0	0	0	0	Rarely/sometimes	Often times	Often times	Sanitary	Yes
Female	2	>=1 &<3	0	No	0	No	0	No	0	0	0	0	0	0	0	Often/always	Sometimes	Not at all	Sanitary	No
Male	1	>=1 &<3	1	Yes	17	No	0	No	0	408	1-1999epg	0	0	0	0	Rarely/sometimes	Sometimes	Sometimes	Sanitary	Yes
Female	4	>=3 & <5	0	No	0	No	0	No	0	0	0	0	0	0	0	Often/always	Not at all	Often times	Sanitary	No
Female	4	>=3 & <5	0	No	0	No	0	No	0	0	0	0	0	0	0	Often/always	Sometimes	Often times	Sanitary	Yes
Female	5	>4	0	No	0	No	0	No	0	0	0	0	0	0	0	Often/always	Not at all	Often times	Sanitary	Yes
Male	2	>=1 &<3	0	No	0	No	0	No	0	0	0	0	0	0	0	Often/always	Sometimes	Often times	Sanitary	Yes
Female	1	>=1 &<3	0	No	0	No	0	No	0	0	0	0	0	0	0	Often/always	Sometimes	Not at all	Sanitary	Yes
Female	2	>=1 &<3	0	No	0	No	0	No	0	0	0	0	0	0	0	Often/always	Often times	Often times	Sanitary	Yes
Male	4	>=3 & <5	0	No	0	No	0	No	0	0	0	0	0	0	0	Often/always	Often times	Sometimes	Sanitary	Yes
Male	2	>=1 &<3	0	No	0	No	0	No	0	0	0	0	0	0	0	Often/always	Sometimes	Sometimes	Sanitary	Yes
Male	4	>=3 & <5	0	No	0	No	0	No	0	0	0	0	0	0	0	Often/always	Often times	Sometimes	Unsanitary	No
Female	3	>=3 & <5	0	No	0	No	0	No	0	0	0	0	0	0	0	Often/always	Sometimes	Sometimes	Sanitary	Yes
Female	5	>4	1	No	0	Yes	5	No	0	0	0	120	1-4999epg	0	0	Rarely/sometimes	Sometimes	Often times	Sanitary	No
Female	1	>=1 &<3	0	No	0	No	0	No	0	0	0	0	0	0	0	Often/always	Sometimes	Sometimes	Sanitary	Yes
Male	2	>=1 &<3	0	No	0	No	0	No	0	0	0	0	0	0	0	Often/always	Often times	Sometimes	Sanitary	Yes
Male	5	>4	1	Yes	15	No	0	No	0	360	1-1999epg	0	1-4999epg	0	0	Often/always	Often times	Sometimes	Unsanitary	No
Female	5	>4	0	No	0	No	0	No	0	0	0	0	0	0	0	Often/always	Often times	Sometimes	Sanitary	No
Male	5	>4	1	Yes	60	No	0	No	0	1440	1-1999epg	0	0	0	0	Rarely/sometimes	Often times	Sometimes	Sanitary	Yes
Female	3	>=3 & <5	0	No	0	No	0	No	0	0	0	0	0	0	0	Rarely/sometimes	Not at all	Often times	Sanitary	Yes
Male	3	>=3 & <5	1	Yes	3	No	0	No	0	72	1-1999epg	0	0	0	0	Rarely/sometimes	Sometimes	Not at all	Sanitary	Yes
Female	2	>=1 &<3	0	No	0	No	0	No	0	0	0	0	0	0	0	Rarely/sometimes	Often times	Often times	Sanitary	Yes
Male	1	>=1 &<3	0	No	0	No	0	No	0	0	0	0	0	0	0	Often/always	Often times	Often times	Unsanitary	Yes
Female	4	>=3 & <5	0	No	0	No	0	No	0	0	0	0	0	0	0	Often/always	Often times	Often times	Sanitary	No
Male	5	>4	1	Yes	50	No	0	No	0	1200	1-1999epg	0	0	0	0	Rarely/sometimes	Not at all	Often times	Sanitary	Yes
Female	4	>=3 & <5	0	No	0	No	0	No	0	0	0	0	0	0	0	Rarely/sometimes	Often times	Sometimes	Sanitary	Yes
Female	5	>4	0	No	0	No	0	No	0	0	0	0	0	0	0	Rarely/sometimes	Sometimes	Often times	Sanitary	Yes
Male	2	>=1 &<3	0	No	0	No	0	No	0	0	0	0	0	0	0	Rarely/sometimes	Often times	Often times	Sanitary	No
Female	3	>=3 & <5	0	No	0	No	0	No	0	0	0	0	0	0	0	Rarely/sometimes	Often times	Sometimes	Sanitary	Yes
Male	1	>=1 &<3	0	No	0	No	0	No	0	0	0	0	0	0	0	Rarely/sometimes	Often times	Often times	Sanitary	Yes
Female	4	>=3 & <5	1	Yes	9	No	0	No	0	216	1-1999epg	0	0	0	0	Rarely/sometimes	Sometimes	Sometimes	Unsanitary	No
Male	1	>=1 &<3	0	No	0	No	0	No	0	0	0	0	0	0	0	Often/always	Sometimes	Often times	Sanitary	No
Female	5	>4	0	No	0	No	0	No	0	0	0	0	0	0	0	Often/always	Sometimes	Often times	Sanitary	Yes
Male	3	>=3 & <5	0	No	0	No	0	No	0	0	0	0	0	0	0	Often/always	Often times	Often times	Sanitary	No
Female	2	>=1 &<3	0	No	0	No	0	No	0	0	0	0	0	0	0	Often/always	Sometimes	Sometimes	Sanitary	Yes
Female	3	>=3 & <5	1	Yes	7	No	0	No	0	168	1-1999epg	0	0	0	0	Often/always	Sometimes	Sometimes	Sanitary	No
Female	3	>=3 & <5	1	No	0	Yes	14	No	0	0	0	336	1-4999epg	0	0	Rarely/sometimes	Sometimes	Often times	Sanitary	No
Female	4	>=3 & <5	0	No	0	No	0	No	0	0	0	0	0	0	0	Often/always	Often times	Often times	Sanitary	No
Female	3	>=3 & <5	0	No	0	No	0	No	0	0	0	0	0	0	0	Often/always	Often times	Sometimes	Sanitary	No
Male	2	>=1 &<3	0	No	0	No	0	No	0	0	0	0	0	0	0	Often/always	Often times	Sometimes	Sanitary	Yes
Male	5	>4	0	No	0	No	0	No	0	0	0	0	0	0	0	Often/always	Often times	Sometimes	Sanitary	Yes
Female	1	>=1 &<3	0	No	0	No	0	No	0	0	0	0	0	0	0	Rarely/sometimes	Sometimes	Often times	Sanitary	Yes
Male	5	>4	0	No	0	No	0	No	0	0	0	0	0	0	0	Often/always	Often times	Often times	Sanitary	Yes
Male	4	>=3 & <5	0	No	0	No	0	No	0	0	0	0	0	0	0	Often/always	Not at all	Sometimes	Sanitary	No
Male	4	>=3 & <5	1	Yes	120	Yes	288	No	0	2880	2000-3999epg	6912	5000-49,999epg	0	0	Rarely/sometimes	Not at all	Sometimes	Sanitary	No
Male	1	>=1 &<3	0	No	0	No	0	No	0	0	0	0	0	0	0	Often/always	Often times	Often times	Sanitary	Yes
Male	3	>=3 & <5	1	Yes	6	No	0	No	0	144	1-1999epg	0	0	0	0	Rarely/sometimes	Sometimes	Sometimes	Unsanitary	Yes
Male	3	>=3 & <5	1	No	0	Yes	7	No	0	0	0	168	1-4999epg	0	0	Rarely/sometimes	Often times	Often times	Sanitary	No
Male	2	>=1 &<3	0	No	0	No	0	No	0	0	0	0	0	0	0	Rarely/sometimes	Not at all	Often times	Sanitary	Yes
Male	5	>4	0	No	0	No	0	No	0	0	0	0	0	0	0	Rarely/sometimes	Often times	Often times	Sanitary	Yes
Female	2	>=1 &<3	1	Yes	4	No	0	No	0	96	1-1999epg	0	0	0	0	Rarely/sometimes	Sometimes	Sometimes	Sanitary	No
Female	4	>=3 & <5	0	No	0	No	0	No	0	0	0	0	0	0	0	Rarely/sometimes	Often times	Not at all	Sanitary	No
Female	5	>4	0	No	0	No	0	No	0	0	0	0	0	0	0	Often/always	Often times	Sometimes	Sanitary	Yes
Female	5	>4	1	Yes	8	No	0	No	0	192	1-1999epg	0	0	0	0	Rarely/sometimes	Often times	Often times	Sanitary	Yes
Female	4	>=3 & <5	1	No	0	Yes	8	No	0	0	0	192	1-4999epg	0	0	Often/always	Often times	Not at all	Unsanitary	Yes
Male	1	>=1 &<3	0	No	0	No	0	No	0	0	0	0	0	0	0	Often/always	Often times	Often times	Sanitary	Yes
Female	1	>=1 &<3	0	No	0	No	0	No	0	0	0	0	0	0	0	Often/always	Often times	Often times	Unsanitary	Yes
Female	2	>=1 &<3	0	No	0	No	0	No	0	0	0	0	0	0	0	Often/always	Often times	Often times	Sanitary	No
Male	1	>=1 &<3	1	Yes	105	No	0	No	0	2520	2000-3999epg	0	0	0	0	Rarely/sometimes	Sometimes	Sometimes	Sanitary	No
Female	3	>=3 & <5	0	No	0	No	0	No	0	0	0	0	0	0	0	Often/always	Often times	Often times	Sanitary	Yes
Male	5	>4	0	No	0	No	0	No	0	0	0	0	0	0	0	Often/always	Often times	Often times	Sanitary	Yes
Female	3	>=3 & <5	1	Yes	3	No	0	No	0	72	1-1999epg	0	0	0	0	Rarely/sometimes	Sometimes	Sometimes	Sanitary	No
Male	1	>=1 &<3	1	No	0	Yes	12	No	0	0	0	288	1-4999epg	0	0	Rarely/sometimes	Sometimes	Often times	Sanitary	No
Male	4	>=3 & <5	1	Yes	2	No	0	No	0	48	1-1999epg	0	0	0	0	Often/always	Sometimes	Often times	Unsanitary	No
Male	2	>=1 &<3	0	No	0	No	0	No	0	0	0	0	0	0	0	Rarely/sometimes	Sometimes	Often times	Sanitary	No
Female	2	>=1 &<3	0	No	0	No	0	No	0	0	0	0	0	0	0	Rarely/sometimes	Often times	Sometimes	Sanitary	Yes
Male	2	>=1 &<3	1	Yes	16	No	0	No	0	384	1-1999epg	0	1-4999epg	0	0	Often/always	Sometimes	Sometimes	Sanitary	Yes
Female	2	>=1 &<3	0	No	0	No	0	No	0	0	0	0	0	0	0	Rarely/sometimes	Often times	Sometimes	Sanitary	Yes
Male	5	>4	0	No	0	No	0	No	0	0	0	0	0	0	0	Rarely/sometimes	Often times	Often times	Sanitary	No
Female	4	>=3 & <5	0	No	0	No	0	No	0	0	0	0	0	0	0	Rarely/sometimes	Often times	Sometimes	Sanitary	Yes
Male	5	>4	1	Yes	160	No	0	No	0	3840	2000-3999epg	0	0	0	0	Rarely/sometimes	Sometimes	Sometimes	Sanitary	No
Male	2	>=1 &<3	1	Yes	6	No	0	No	0	144	1-1999epg	0	0	0	1-999epg	Rarely/sometimes	Sometimes	Not at all	Sanitary	No
Male	3	>=3 & <5	0	No	0	No	0	No	0	0	0	0	0	0	0	Rarely/sometimes	Often times	Often times	Sanitary	No
Female	4	>=3 & <5	1	No	0	Yes	7	No	0	0	0	168	1-4999epg	0	0	Rarely/sometimes	Sometimes	Sometimes	Unsanitary	No
Female	2	>=1 &<3	0	No	0	No	0	No	0	0	0	0	0	0	0	Rarely/sometimes	Sometimes	Often times	Sanitary	Yes
Female	3	>=3 & <5	0	No	0	No	0	No	0	0	0	0	0	0	0	Often/always	Not at all	Often times	Unsanitary	No
Female	5	>4	0	No	0	No	0	No	0	0	0	0	0	0	0	Often/always	Not at all	Often times	Unsanitary	Yes
Female	4	>=3 & <5	1	Yes	8	No	0	No	0	192	1-1999epg	0	0	0	0	Rarely/sometimes	Often times	Not at all	Sanitary	Yes
Male	1	>=1 &<3	0	No	0	No	0	No	0	0	0	0	0	0	0	Often/always	Often times	Often times	Unsanitary	No
Female	4	>=3 & <5	0	No	0	No	0	No	0	0	0	0	0	0	0	Often/always	Often times	Often times	Sanitary	Yes
Female	5	>4	1	No	0	Yes	7	No	0	0	1-1999epg	168	1-4999epg	0	0	Often/always	Sometimes	Often times	Sanitary	Yes
Female	3	>=3 & <5	0	No	0	No	0	No	0	0	0	0	0	0	0	Often/always	Sometimes	Often times	Sanitary	Yes
Male	3	>=3 & <5	0	No	0	No	0	No	0	0	0	0	0	0	0	Often/always	Often times	Often times	Unsanitary	Yes
Female	1	>=1 &<3	0	No	0	No	0	No	0	0	0	0	0	0	0	Often/always	Often times	Sometimes	Sanitary	Yes
Female	5	>4	0	No	0	No	0	No	0	0	0	0	0	0	0	Rarely/sometimes	Often times	Often times	Sanitary	No
Female	4	>=3 & <5	1	Yes	16	Yes	8	No	0	384	1-1999epg	192	1-4999epg	0	0	Rarely/sometimes	Often times	Sometimes	Sanitary	No
Female	3	>=3 & <5	0	No	0	No	0	No	0	0	0	0	0	0	0	Often/always	Sometimes	Often times	Unsanitary	Yes
Female	3	>=3 & <5	0	No	0	No	0	No	0	0	0	0	0	0	0	Often/always	Sometimes	Often times	Sanitary	Yes
Female	3	>=3 & <5	0	No	0	No	0	No	0	0	0	0	0	0	0	Often/always	Sometimes	Often times	Unsanitary	Yes
Female	3	>=3 & <5	0	No	0	No	0	No	0	0	0	0	0	0	0	Rarely/sometimes	Sometimes	Sometimes	Sanitary	Yes
Female	3	>=3 & <5	0	No	0	No	0	No	0	0	0	0	0	0	0	Often/always	Often times	Often times	Unsanitary	Yes
Female	3	>=3 & <5	1	Yes	9	No	0	No	0	216	1-1999epg	0	0	0	0	Rarely/sometimes	Sometimes	Sometimes	Sanitary	No
Male	1	>=1 &<3	1	Yes	5	No	0	No	0	120	1-1999epg	0	0	0	0	Rarely/sometimes	Sometimes	Often times	Unsanitary	No
Female	1	>=1 &<3	0	No	0	No	0	No	0	0	0	0	0	0	0	Often/always	Often times	Sometimes	Sanitary	Yes
Male	2	>=1 &<3	0	No	0	No	0	No	0	0	0	0	0	0	0	Often/always	Often times	Often times	Sanitary	No
Male	4	>=3 & <5	1	No	0	Yes	5	No	0	0	0	120	1-4999epg	0	0	Often/always	Sometimes	Sometimes	Unsanitary	No
Female	4	>=3 & <5	0	No	0	No	0	No	0	0	0	0	0	0	0	Rarely/sometimes	Sometimes	Often times	Sanitary	No
Female	3	>=3 & <5	0	No	0	No	0	No	0	0	0	0	0	0	0	Rarely/sometimes	Often times	Sometimes	Sanitary	Yes
Male	1	>=1 &<3	0	No	0	No	0	No	0	0	0	0	0	0	0	Rarely/sometimes	Often times	Sometimes	Sanitary	Yes
Female	5	>4	0	No	0	No	0	No	0	0	0	0	0	0	0	Rarely/sometimes	Sometimes	Often times	Sanitary	Yes
Female	2	>=1 &<3	0	No	0	No	0	No	0	0	0	0	0	0	0	Often/always	Often times	Often times	Sanitary	Yes
Female	3	>=3 & <5	0	No	0	No	0	No	0	0	0	0	0	0	0	Rarely/sometimes	Often times	Often times	Sanitary	Yes
Female	4	>=3 & <5	0	No	0	No	0	No	0	0	0	0	0	0	0	Rarely/sometimes	Not at all	Often times	Sanitary	Yes
Female	5	>4	0	No	0	No	0	No	0	0	0	0	0	0	0	Rarely/sometimes	Sometimes	Not at all	Sanitary	No
Female	3	>=3 & <5	0	No	0	No	0	No	0	0	0	0	0	0	0	Rarely/sometimes	Sometimes	Sometimes	Sanitary	Yes
Male	5	>4	0	No	0	No	0	No	0	0	0	0	0	0	0	Rarely/sometimes	Not at all	Not at all	Sanitary	Yes
Male	3	>=3 & <5	0	No	0	No	0	No	0	0	0	0	0	0	0	Rarely/sometimes	Often times	Often times	Sanitary	Yes
Female	1	>=1 &<3	0	No	0	No	0	No	0	0	0	0	0	0	0	Often/always	Often times	Often times	Sanitary	Yes
Female	3	>=3 & <5	1	Yes	200	No	0	No	0	4800	>=4000epg	0	0	0	0	Rarely/sometimes	Sometimes	Sometimes	Sanitary	Yes
Male	2	>=1 &<3	0	No	0	No	0	No	0	0	0	0	0	0	0	Rarely/sometimes	Often times	Often times	Sanitary	Yes
Male	4	>=3 & <5	0	No	0	No	0	No	0	0	0	0	0	0	0	Often/always	Sometimes	Often times	Sanitary	No
Female	2	>=1 &<3	0	No	0	No	0	No	0	0	0	0	0	0	0	Often/always	Often times	Not at all	Sanitary	No
Male	5	>4	0	No	0	No	0	No	0	0	0	0	0	0	0	Rarely/sometimes	Often times	Not at all	Sanitary	Yes
Female	2	>=1 &<3	0	No	0	No	0	No	0	0	0	0	0	0	0	Often/always	Often times	Often times	Sanitary	No
Male	4	>=3 & <5	0	No	0	No	0	No	0	0	0	0	0	0	0	Rarely/sometimes	Often times	Often times	Sanitary	Yes
Male	3	>=3 & <5	0	No	0	No	0	No	0	0	0	0	0	0	0	Rarely/sometimes	Sometimes	Often times	Sanitary	Yes
Male	3	>=3 & <5	0	No	0	No	0	No	0	0	0	0	0	0	0	Often/always	Often times	Often times	Sanitary	No
Male	4	>=3 & <5	0	No	0	No	0	No	0	0	0	0	0	0	0	Rarely/sometimes	Often times	Often times	Sanitary	Yes
Female	5	>4	0	No	0	No	0	No	0	0	0	0	0	0	0	Often/always	Sometimes	Often times	Unsanitary	Yes
Male	2	>=1 &<3	0	No	0	No	0	No	0	0	0	0	0	0	0	Often/always	Sometimes	Often times	Unsanitary	Yes
Female	4	>=3 & <5	0	No	0	No	0	No	0	0	0	0	0	0	0	Often/always	Sometimes	Often times	Sanitary	No
Male	3	>=3 & <5	0	No	0	No	0	No	0	0	0	0	0	0	0	Often/always	Sometimes	Sometimes	Unsanitary	No
Male	4	>=3 & <5	0	No	0	No	0	No	0	0	0	0	0	0	0	Often/always	Sometimes	Often times	Unsanitary	No
Male	3	>=3 & <5	0	No	0	No	0	No	0	0	0	0	0	0	0	Often/always	Not at all	Often times	Unsanitary	No
Female	5	>4	1	No	0	Yes	100	No	0	0	0	2400	1-4999epg	0	0	Rarely/sometimes	Often times	Sometimes	Unsanitary	No
Male	4	>=3 & <5	1	Yes	50	Yes	300	No	0	1200	1-1999epg	7200	5000-49,999epg	0	0	Often/always	Sometimes	Sometimes	Unsanitary	No
Female	2	>=1 &<3	0	No	0	No	0	No	0	0	0	0	0	0	0	Often/always	Often times	Often times	Sanitary	No
Female	2	>=1 &<3	0	No	0	No	0	No	0	0	0	0	0	0	0	Often/always	Sometimes	Sometimes	Unsanitary	Yes
Male	4	>=3 & <5	0	No	0	No	0	No	0	0	0	0	0	0	0	Often/always	Often times	Sometimes	Sanitary	No
Male	5	>4	0	No	0	No	0	No	0	0	0	0	0	0	0	Often/always	Sometimes	Sometimes	Sanitary	No
Male	4	>=3 & <5	0	No	0	No	0	No	0	0	0	0	0	0	0	Rarely/sometimes	Often times	Often times	Unsanitary	Yes
Female	3	>=3 & <5	0	No	0	No	0	No	0	0	0	0	0	0	0	Rarely/sometimes	Often times	Sometimes	Unsanitary	Yes
Female	2	>=1 &<3	0	No	0	No	0	No	0	0	0	0	0	0	0	Rarely/sometimes	Sometimes	Sometimes	Sanitary	Yes
Male	5	>4	0	No	0	No	0	No	0	0	0	0	0	0	0	Rarely/sometimes	Sometimes	Often times	Sanitary	Yes
Female	5	>4	0	No	0	No	0	No	0	0	0	0	0	0	0	Rarely/sometimes	Often times	Often times	Unsanitary	Yes
Male	1	>=1 &<3	0	No	0	No	0	No	0	0	0	0	0	0	0	Often/always	Often times	Often times	Unsanitary	Yes
Female	2	>=1 &<3	0	No	0	No	0	No	0	0	0	0	0	0	0	Rarely/sometimes	Often times	Sometimes	Sanitary	Yes
Female	5	>4	0	No	0	No	0	No	0	0	0	0	0	0	0	Rarely/sometimes	Often times	Sometimes	Sanitary	Yes
Female	3	>=3 & <5	0	No	0	No	0	No	0	0	0	0	0	0	0	Often/always	Sometimes	Not at all	Sanitary	Yes
Female	5	>4	0	No	0	No	0	No	0	0	0	0	0	0	0	Rarely/sometimes	Sometimes	Sometimes	Unsanitary	No
Male	4	>=3 & <5	0	No	0	No	0	No	0	0	0	0	0	0	0	Often/always	Sometimes	Often times	Sanitary	Yes
Female	3	>=3 & <5	0	No	0	No	0	No	0	0	0	0	0	0	0	Often/always	Often times	Often times	Sanitary	Yes
Female	4	>=3 & <5	0	No	0	No	0	No	0	0	0	0	0	0	0	Rarely/sometimes	Sometimes	Not at all	Sanitary	Yes
Male	5	>4	0	No	0	No	0	No	0	0	0	0	0	0	0	Rarely/sometimes	Not at all	Often times	Sanitary	Yes
Female	3	>=3 & <5	0	No	0	No	0	No	0	0	0	0	0	0	0	Often/always	Sometimes	Often times	Sanitary	Yes
Female	2	>=1 &<3	0	No	0	No	0	No	0	0	0	0	0	0	0	Often/always	Sometimes	Sometimes	Sanitary	Yes
Female	3	>=3 & <5	0	No	0	No	0	No	0	0	0	0	0	0	0	Often/always	Sometimes	Sometimes	Sanitary	Yes
Male	5	>4	0	No	0	No	0	No	0	0	0	0	0	0	0	Often/always	Often times	Often times	Sanitary	Yes
Female	2	>=1 &<3	0	No	0	No	0	No	0	0	0	0	0	0	0	Often/always	Often times	Sometimes	Unsanitary	Yes
Female	5	>4	0	No	0	No	0	No	0	0	0	0	0	0	0	Often/always	Sometimes	Often times	Sanitary	Yes
Male	2	>=1 &<3	0	No	0	No	0	No	0	0	0	0	0	0	0	Often/always	Sometimes	Often times	Sanitary	No
Female	4	>=3 & <5	0	No	0	No	0	No	0	0	0	0	0	0	0	Often/always	Not at all	Sometimes	Sanitary	Yes
Male	3	>=3 & <5	0	No	0	No	0	No	0	0	0	0	0	0	0	Often/always	Often times	Sometimes	Unsanitary	Yes
Female	4	>=3 & <5	0	No	0	No	0	No	0	0	0	0	0	0	0	Often/always	Sometimes	Often times	Unsanitary	No
Male	4	>=3 & <5	0	No	0	No	0	No	0	0	0	0	0	0	0	Often/always	Often times	Sometimes	Unsanitary	No
Female	5	>4	0	No	0	No	0	No	0	0	0	0	0	0	0	Often/always	Sometimes	Often times	Sanitary	Yes
Male	4	>=3 & <5	0	No	0	No	0	No	0	0	0	0	0	0	0	Often/always	Sometimes	Often times	Sanitary	Yes
Female	4	>=3 & <5	0	No	0	No	0	No	0	0	0	0	0	0	0	Often/always	Sometimes	Sometimes	Sanitary	Yes
Female	4	>=3 & <5	0	No	0	No	0	No	0	0	0	0	0	0	0	Often/always	Often times	Sometimes	Sanitary	Yes
Male	4	>=3 & <5	0	No	0	No	0	No	0	0	0	0	0	0	0	Often/always	Often times	Often times	Sanitary	No
Male	4	>=3 & <5	0	No	0	No	0	No	0	0	0	0	0	0	0	Often/always	Sometimes	Often times	Sanitary	No
Male	4	>=3 & <5	0	No	0	No	0	No	0	0	0	0	0	0	0	Often/always	Not at all	Often times	Unsanitary	No
Female	4	>=3 & <5	0	No	0	No	0	No	0	0	0	0	0	0	0	Rarely/sometimes	Often times	Sometimes	Sanitary	Yes
Male	2	>=1 &<3	0	No	0	No	0	No	0	0	0	0	0	0	0	Often/always	Sometimes	Often times	Sanitary	No
Male	5	>4	0	No	0	No	0	No	0	0	0	0	0	0	0	Often/always	Sometimes	Often times	Unsanitary	Yes
Female	1	>=1 &<3	0	No	0	No	0	No	0	0	0	0	0	0	0	Rarely/sometimes	Sometimes	Not at all	Unsanitary	Yes
Male	1	>=1 &<3	0	No	0	No	0	No	0	0	0	0	0	0	0	Rarely/sometimes	Sometimes	Often times	Sanitary	Yes
Female	4	>=3 & <5	0	No	0	No	0	No	0	0	0	0	0	0	0	Often/always	Often times	Not at all	Sanitary	Yes
Female	1	>=1 &<3	0	No	0	No	0	No	0	0	0	0	0	0	0	Often/always	Often times	Often times	Unsanitary	Yes
Male	3	>=3 & <5	0	No	0	No	0	No	0	0	0	0	0	0	0	Often/always	Sometimes	Often times	Unsanitary	Yes
Female	5	>4	0	No	0	No	0	No	0	0	0	0	0	0	0	Rarely/sometimes	Often times	Sometimes	Unsanitary	Yes
Male	2	>=1 &<3	0	No	0	No	0	No	0	0	0	0	0	0	0	Rarely/sometimes	Often times	Often times	Sanitary	Yes
Male	4	>=3 & <5	0	No	0	No	0	No	0	0	0	0	0	0	0	Rarely/sometimes	Sometimes	Sometimes	Sanitary	Yes
Female	4	>=3 & <5	0	No	0	No	0	No	0	0	0	0	0	0	0	Often/always	Often times	Sometimes	Unsanitary	No
Male	3	>=3 & <5	0	No	0	No	0	No	0	0	0	0	0	0	0	Rarely/sometimes	Often times	Often times	Sanitary	No
Female	5	>4	0	No	0	No	0	No	0	0	0	0	0	0	0	Rarely/sometimes	Sometimes	Sometimes	Unsanitary	Yes
Female	4	>=3 & <5	0	No	0	No	0	No	0	0	0	0	0	0	0	Often/always	Sometimes	Sometimes	Unsanitary	Yes
Female	4	>=3 & <5	0	No	0	No	0	No	0	0	0	0	0	0	0	Often/always	Sometimes	Not at all	Sanitary	No
Male	5	>4	0	No	0	No	0	No	0	0	0	0	0	0	0	Often/always	Sometimes	Sometimes	Sanitary	No
Female	4	>=3 & <5	0	No	0	No	0	No	0	0	0	0	0	0	0	Often/always	Sometimes	Sometimes	Sanitary	Yes
Female	5	>4	0	No	0	No	0	No	0	0	0	0	0	0	0	Often/always	Not at all	Sometimes	Unsanitary	Yes
Female	3	>=3 & <5	0	No	0	No	0	No	0	0	0	0	0	0	0	Often/always	Often times	Sometimes	Unsanitary	No
Male	5	>4	0	No	0	No	0	No	0	0	0	0	0	0	0	Often/always	Not at all	Not at all	Sanitary	Yes
Female	5	>4	0	No	0	No	0	No	0	0	0	0	0	0	0	Rarely/sometimes	Not at all	Often times	Sanitary	No
Male	1	>=1 &<3	0	No	0	No	0	No	0	0	0	0	0	0	0	Often/always	Often times	Sometimes	Sanitary	Yes
Female	3	>=3 & <5	0	No	0	No	0	No	0	0	0	0	0	0	0	Often/always	Often times	Sometimes	Unsanitary	Yes
Female	5	>4	0	No	0	No	0	No	0	0	0	0	0	0	0	Often/always	Sometimes	Sometimes	Sanitary	Yes
Female	3	>=3 & <5	0	No	0	No	0	No	0	0	0	0	0	0	0	Often/always	Sometimes	Often times	Sanitary	Yes
Female	4	>=3 & <5	0	No	0	No	0	No	0	0	0	0	0	0	0	Often/always	Sometimes	Often times	Unsanitary	Yes
Male	4	>=3 & <5	0	No	0	No	0	No	0	0	0	0	0	0	0	Often/always	Often times	Sometimes	Sanitary	Yes
Female	2	>=1 &<3	0	No	0	No	0	No	0	0	0	0	0	0	0	Often/always	Sometimes	Sometimes	Unsanitary	Yes
Female	2	>=1 &<3	0	No	0	No	0	No	0	0	0	0	0	0	0	Often/always	Sometimes	Sometimes	Sanitary	Yes
Male	5	>4	0	No	0	No	0	No	0	0	0	0	0	0	0	Often/always	Sometimes	Sometimes	Unsanitary	No
Male	1	>=1 &<3	0	No	0	No	0	No	0	0	0	0	0	0	0	Often/always	Often times	Sometimes	Sanitary	Yes
Female	1	>=1 &<3	0	No	0	No	0	No	0	0	0	0	0	0	0	Often/always	Sometimes	Sometimes	Unsanitary	No
Female	5	>4	0	No	0	No	0	No	0	0	0	0	0	0	0	Rarely/sometimes	Often times	Sometimes	Sanitary	No
Female	4	>=3 & <5	1	Yes	10	No	0	No	0	240	1-1999epg	0	0	0	0	Rarely/sometimes	Not at all	Sometimes	Sanitary	Yes
Female	2	>=1 &<3	0	No	0	No	0	No	0	0	0	0	0	0	0	Rarely/sometimes	Sometimes	Often times	Sanitary	No
Female	4	>=3 & <5	1	Yes	105	Yes	85	No	0	2520	2000-3999epg	2040	1-4999epg	0	0	Rarely/sometimes	Often times	Not at all	Sanitary	Yes
Female	2	>=1 &<3	1	No	0	No	0	Yes	14	0	0	0	1-4999epg	336	1-999epg	Rarely/sometimes	Sometimes	Often times	Unsanitary	No
Male	3	>=3 & <5	0	No	0	No	0	No	0	0	0	0	0	0	0	Often/always	Often times	Not at all	Sanitary	No
Female	2	>=1 &<3	0	No	0	No	0	No	0	0	0	0	0	0	0	Often/always	Often times	Sometimes	Sanitary	Yes
Male	1	>=1 &<3	0	No	0	No	0	No	0	0	0	0	0	0	0	Often/always	Often times	Sometimes	Sanitary	No
Male	3	>=3 & <5	1	Yes	180	Yes	11	No	0	4320	>=4000epg	264	1-4999epg	0	0	Often/always	Sometimes	Often times	Sanitary	No
Male	3	>=3 & <5	0	No	0	No	0	No	0	0	0	0	0	0	0	Rarely/sometimes	Often times	Often times	Sanitary	Yes
Male	4	>=3 & <5	0	No	0	No	0	No	0	0	0	0	0	0	0	Rarely/sometimes	Sometimes	Not at all	Sanitary	No
Male	5	>4	1	Yes	5	No	0	No	0	120	1-1999epg	0	0	0	0	Rarely/sometimes	Often times	Sometimes	Unsanitary	Yes
Female	4	>=3 & <5	1	Yes	160	No	0	No	0	3840	2000-3999epg	0	0	0	0	Rarely/sometimes	Often times	Sometimes	Sanitary	Yes
Female	5	>4	1	No	0	Yes	11	No	0	0	0	264	1-4999epg	0	0	Often/always	Sometimes	Often times	Sanitary	Yes
Male	4	>=3 & <5	0	No	0	No	0	No	0	0	0	0	0	0	0	Often/always	Sometimes	Often times	Unsanitary	Yes
Female	3	>=3 & <5	0	No	0	No	0	No	0	0	0	0	0	0	0	Often/always	Often times	Often times	Sanitary	Yes
Male	3	>=3 & <5	1	Yes	220	No	0	No	0	5280	>=4000epg	0	0	0	0	Rarely/sometimes	Sometimes	Sometimes	Unsanitary	Yes
Male	4	>=3 & <5	0	No	0	No	0	No	0	0	0	0	0	0	0	Often/always	Often times	Sometimes	Unsanitary	Yes
Female	2	>=1 &<3	1	Yes	7	No	0	No	0	168	1-1999epg	0	0	0	0	Rarely/sometimes	Sometimes	Sometimes	Sanitary	Yes
Female	4	>=3 & <5	0	No	0	No	0	No	0	0	0	0	0	0	0	Often/always	Sometimes	Often times	Unsanitary	Yes
Female	3	>=3 & <5	0	No	0	No	0	No	0	0	0	0	0	0	0	Rarely/sometimes	Sometimes	Sometimes	Sanitary	Yes
Female	4	>=3 & <5	1	Yes	17	No	0	No	0	408	1-1999epg	0	0	0	0	Often/always	Sometimes	Sometimes	Sanitary	Yes
Female	3	>=3 & <5	1	Yes	180	No	0	No	0	4320	>=4000epg	0	0	0	0	Rarely/sometimes	Often times	Often times	Unsanitary	Yes
Female	3	>=3 & <5	0	No	0	No	0	No	0	0	0	0	0	0	0	Rarely/sometimes	Often times	Often times	Sanitary	No
Female	4	>=3 & <5	0	No	0	No	0	No	0	0	0	0	0	0	0	Rarely/sometimes	Often times	Often times	Unsanitary	Yes
Male	3	>=3 & <5	0	No	0	No	0	No	0	0	0	0	0	0	0	Rarely/sometimes	Sometimes	Often times	Unsanitary	No
Male	4	>=3 & <5	0	No	0	No	0	No	0	0	0	0	0	0	0	Rarely/sometimes	Often times	Often times	Sanitary	Yes
Male	4	>=3 & <5	1	Yes	6	No	0	No	0	144	1-1999epg	0	0	0	0	Rarely/sometimes	Sometimes	Often times	Unsanitary	No
Male	3	>=3 & <5	1	No	0	No	0	No	0	0	0	0	1-4999epg	0	0	Rarely/sometimes	Sometimes	Sometimes	Unsanitary	No
Female	4	>=3 & <5	1	Yes	10	No	0	No	0	240	1-1999epg	0	0	0	0	Rarely/sometimes	Often times	Sometimes	Unsanitary	No
Female	3	>=3 & <5	0	No	0	No	0	No	0	0	0	0	0	0	0	Rarely/sometimes	Sometimes	Sometimes	Unsanitary	Yes
Female	4	>=3 & <5	0	No	0	No	0	No	0	0	0	0	0	0	0	Often/always	Sometimes	Often times	Unsanitary	Yes
Male	3	>=3 & <5	1	Yes	7	No	0	No	0	168	1-1999epg	0	0	0	0	Rarely/sometimes	Not at all	Often times	Sanitary	Yes
Male	1	>=1 &<3	0	No	0	No	0	No	0	0	0	0	0	0	0	Often/always	Often times	Often times	Sanitary	No
Female	5	>4	0	No	0	No	0	No	0	0	0	0	0	0	0	Often/always	Often times	Often times	Sanitary	Yes
Female	1	>=1 &<3	0	No	0	No	0	No	0	0	0	0	0	0	0	Often/always	Often times	Often times	Sanitary	Yes
Male	2	>=1 &<3	0	No	0	No	0	No	0	0	0	0	0	0	0	Often/always	Sometimes	Often times	Sanitary	Yes
Male	3	>=3 & <5	1	Yes	109	Yes	9	No	0	2616	2000-3999epg	216	1-4999epg	0	0	Rarely/sometimes	Often times	Not at all	Sanitary	Yes
Male	3	>=3 & <5	0	No	0	No	0	No	0	0	0	0	0	0	0	Often/always	Sometimes	Sometimes	Sanitary	Yes
Female	3	>=3 & <5	0	No	0	No	0	No	0	0	0	0	0	0	0	Rarely/sometimes	Not at all	Not at all	Sanitary	Yes
Male	5	>4	1	Yes	14	No	0	No	0	336	1-1999epg	0	0	0	0	Rarely/sometimes	Often times	Sometimes	Sanitary	Yes
Male	4	>=3 & <5	0	No	0	No	0	No	0	0	0	0	0	0	0	Rarely/sometimes	Sometimes	Often times	Sanitary	Yes
Female	5	>4	0	No	0	No	0	No	0	0	0	0	0	0	0	Often/always	Sometimes	Often times	Sanitary	No
Female	3	>=3 & <5	0	No	0	No	0	No	0	0	0	0	0	0	0	Often/always	Often times	Sometimes	Sanitary	Yes
Male	1	>=1 &<3	0	No	0	No	0	No	0	0	0	0	0	0	0	Often/always	Sometimes	Often times	Sanitary	Yes
Male	5	>4	0	No	0	No	0	No	0	0	0	0	0	0	0	Often/always	Often times	Sometimes	Sanitary	Yes
Male	1	>=1 &<3	1	Yes	6	No	0	No	0	144	1-1999epg	0	0	0	0	Often/always	Sometimes	Sometimes	Unsanitary	Yes
Female	3	>=3 & <5	0	No	0	No	0	No	0	0	0	0	0	0	0	Often/always	Sometimes	Often times	Sanitary	Yes
Female	4	>=3 & <5	0	No	0	No	0	No	0	0	0	0	0	0	0	Often/always	Sometimes	Sometimes	Sanitary	Yes
Female	4	>=3 & <5	0	No	0	No	0	No	0	0	0	0	0	0	0	Often/always	Sometimes	Sometimes	Sanitary	Yes
Male	2	>=1 &<3	0	No	0	No	0	No	0	0	0	0	0	0	0	Often/always	Sometimes	Sometimes	Sanitary	No
Male	3	>=3 & <5	1	Yes	105	No	0	No	0	2520	2000-3999epg	0	0	0	0	Often/always	Sometimes	Sometimes	Sanitary	Yes
Female	5	>4	1	No	0	No	0	Yes	11	0	0	0	0	264	1-999epg	Rarely/sometimes	Sometimes	Not at all	Unsanitary	Yes
Male	3	>=3 & <5	1	Yes	5	No	0	No	0	120	1-1999epg	0	0	0	0	Rarely/sometimes	Sometimes	Sometimes	Sanitary	Yes
Female	2	>=1 &<3	0	No	0	No	0	No	0	0	0	0	0	0	0	Often/always	Not at all	Sometimes	Sanitary	Yes
Female	4	>=3 & <5	0	No	0	No	0	No	0	0	0	0	0	0	0	Often/always	Sometimes	Often times	Sanitary	Yes
Male	5	>4	0	No	0	No	0	No	0	0	0	0	0	0	0	Often/always	Sometimes	Sometimes	Sanitary	Yes
Male	3	>=3 & <5	1	Yes	135	No	0	No	0	3240	2000-3999epg	0	0	0	0	Often/always	Sometimes	Sometimes	Sanitary	No
Female	3	>=3 & <5	1	Yes	200	No	0	No	0	4800	>=4000epg	0	0	0	0	Rarely/sometimes	Often times	Sometimes	Sanitary	No
Female	1	>=1 &<3	0	No	0	No	0	No	0	0	0	0	0	0	0	Often/always	Sometimes	Sometimes	Sanitary	Yes
Male	4	>=3 & <5	0	No	0	No	0	No	0	0	0	0	0	0	0	Often/always	Often times	Sometimes	Sanitary	Yes
Female	5	>4	1	No	0	Yes	6	No	0	0	0	144	1-4999epg	0	0	Often/always	Not at all	Sometimes	Sanitary	Yes
Male	3	>=3 & <5	0	No	0	No	0	No	0	0	0	0	0	0	0	Often/always	Often times	Sometimes	Unsanitary	No
Male	5	>4	1	No	0	Yes	8	No	0	0	0	192	1-4999epg	0	0	Rarely/sometimes	Often times	Not at all	Unsanitary	Yes
Male	1	>=1 &<3	0	No	0	No	0	No	0	0	0	0	0	0	0	Often/always	Often times	Sometimes	Sanitary	Yes
Male	4	>=3 & <5	1	Yes	2	No	0	No	0	48	1-1999epg	0	0	0	0	Rarely/sometimes	Sometimes	Often times	Sanitary	Yes
Female	4	>=3 & <5	0	No	0	No	0	No	0	0	0	0	0	0	0	Often/always	Often times	Often times	Sanitary	No
Male	3	>=3 & <5	0	No	0	No	0	No	0	0	0	0	0	0	0	Often/always	Often times	Often times	Sanitary	Yes
Female	2	>=1 &<3	0	No	0	No	0	No	0	0	0	0	0	0	0	Often/always	Sometimes	Sometimes	Sanitary	Yes
Male	4	>=3 & <5	1	Yes	66	No	0	No	0	1584	1-1999epg	0	0	0	0	Often/always	Sometimes	Often times	Sanitary	Yes
Female	3	>=3 & <5	1	No	0	Yes	12	No	0	0	0	288	1-4999epg	0	0	Rarely/sometimes	Often times	Sometimes	Sanitary	Yes
Female	5	>4	0	No	0	No	0	No	0	0	0	0	0	0	0	Often/always	Sometimes	Sometimes	Sanitary	Yes
Female	2	>=1 &<3	0	No	0	No	0	No	0	0	0	0	0	0	0	Often/always	Often times	Often times	Sanitary	Yes
Male	2	>=1 &<3	1	No	0	Yes	10	No	0	0	1-1999epg	240	1-4999epg	0	0	Rarely/sometimes	Sometimes	Sometimes	Sanitary	Yes
Male	2	>=1 &<3	0	No	0	No	0	No	0	0	0	0	0	0	0	Rarely/sometimes	Often times	Often times	Sanitary	Yes
Male	2	>=1 &<3	0	No	0	No	0	No	0	0	0	0	0	0	0	Often/always	Often times	Often times	Sanitary	Yes
Male	4	>=3 & <5	0	No	0	No	0	No	0	0	0	0	0	0	0	Often/always	Often times	Not at all	Sanitary	Yes
Female	3	>=3 & <5	0	No	0	No	0	No	0	0	0	0	0	0	0	Often/always	Not at all	Sometimes	Unsanitary	Yes
Male	5	>4	0	No	0	No	0	No	0	0	0	0	0	0	0	Often/always	Sometimes	Sometimes	Sanitary	Yes
Female	5	>4	1	No	0	Yes	15	No	0	0	0	360	1-4999epg	0	0	Rarely/sometimes	Sometimes	Sometimes	Unsanitary	Yes
Male	2	>=1 &<3	0	No	0	No	0	No	0	0	0	0	0	0	0	Rarely/sometimes	Sometimes	Often times	Sanitary	Yes
Male	3	>=3 & <5	1	Yes	18	No	0	No	0	432	1-1999epg	0	0	0	0	Rarely/sometimes	Sometimes	Often times	Sanitary	Yes
Female	1	>=1 &<3	0	No	0	No	0	No	0	0	0	0	0	0	0	Often/always	Not at all	Not at all	Sanitary	No
Female	4	>=3 & <5	0	No	0	No	0	No	0	0	0	0	0	0	0	Often/always	Often times	Often times	Sanitary	Yes
Male	1	>=1 &<3	0	No	0	No	0	No	0	0	0	0	0	0	0	Often/always	Sometimes	Often times	Sanitary	Yes
Female	5	>4	0	No	0	No	0	No	0	0	0	0	0	0	0	Often/always	Sometimes	Often times	Sanitary	Yes
Female	4	>=3 & <5	0	No	0	No	0	No	0	0	0	0	0	0	0	Often/always	Often times	Not at all	Sanitary	Yes
Female	1	>=1 &<3	0	No	0	No	0	No	0	0	0	0	0	0	0	Often/always	Often times	Not at all	Sanitary	No
Male	3	>=3 & <5	0	No	0	No	0	No	0	0	0	0	0	0	0	Often/always	Often times	Often times	Unsanitary	Yes
Female	2	>=1 &<3	1	Yes	7	No	0	No	0	168	1-1999epg	0	0	0	0	Often/always	Sometimes	Often times	Unsanitary	Yes
Female	4	>=3 & <5	0	No	0	No	0	No	0	0	0	0	0	0	0	Often/always	Not at all	Often times	Sanitary	Yes
Male	1	>=1 &<3	1	No	0	Yes	66	No	0	0	0	1584	1-4999epg	0	0	Rarely/sometimes	Sometimes	Sometimes	Sanitary	Yes
Female	2	>=1 &<3	0	No	0	No	0	No	0	0	0	0	0	0	0	Often/always	Not at all	Often times	Sanitary	Yes
Female	3	>=3 & <5	1	Yes	13	No	0	No	0	312	1-1999epg	0	0	0	0	Rarely/sometimes	Sometimes	Sometimes	Sanitary	Yes
Female	3	>=3 & <5	0	No	0	No	0	No	0	0	0	0	0	0	0	Often/always	Sometimes	Often times	Sanitary	Yes
Female	2	>=1 &<3	0	No	0	No	0	No	0	0	0	0	0	0	0	Often/always	Sometimes	Sometimes	Sanitary	Yes
Female	4	>=3 & <5	1	Yes	10	No	0	No	0	240	1-1999epg	0	0	0	0	Rarely/sometimes	Sometimes	Sometimes	Unsanitary	No
Female	4	>=3 & <5	0	No	0	No	0	No	0	0	0	0	0	0	0	Often/always	Often times	Often times	Sanitary	Yes
Female	2	>=1 &<3	0	No	0	No	0	No	0	0	0	0	0	0	0	Often/always	Sometimes	Sometimes	Sanitary	Yes
Male	4	>=3 & <5	1	Yes	120	No	0	No	0	2880	2000-3999epg	0	0	0	0	Rarely/sometimes	Sometimes	Sometimes	Sanitary	Yes
Female	5	>4	0	No	0	No	0	No	0	0	0	0	0	0	0	Often/always	Often times	Often times	Sanitary	Yes
Female	4	>=3 & <5	0	No	0	No	0	No	0	0	0	0	0	0	0	Often/always	Sometimes	Often times	Sanitary	Yes
Female	4	>=3 & <5	0	No	0	No	0	No	0	0	0	0	0	0	0	Often/always	Often times	Sometimes	Sanitary	No
Male	1	>=1 &<3	0	No	0	No	0	No	0	0	0	0	0	0	0	Often/always	Sometimes	Sometimes	Sanitary	Yes
Female	5	>4	1	Yes	45	No	0	No	0	1080	1-1999epg	0	0	0	0	Rarely/sometimes	Sometimes	Often times	Sanitary	No
Female	3	>=3 & <5	1	Yes	144	Yes	19	No	0	3456	2000-3999epg	456	1-4999epg	0	0	Often/always	Sometimes	Sometimes	Sanitary	No
Female	5	>4	1	Yes	200	No	0	No	0	4800	>=4000epg	0	0	0	0	Rarely/sometimes	Often times	Sometimes	Sanitary	Yes
Female	5	>4	0	No	0	No	0	No	0	0	0	0	0	0	0	Rarely/sometimes	Sometimes	Often times	Sanitary	Yes
Female	3	>=3 & <5	0	No	0	No	0	No	0	0	0	0	0	0	0	Often/always	Often times	Often times	Sanitary	Yes
Female	1	>=1 &<3	0	No	0	No	0	No	0	0	0	0	0	0	0	Often/always	Sometimes	Often times	Sanitary	No
Female	4	>=3 & <5	1	No	0	Yes	140	No	0	0	0	3360	1-4999epg	0	0	Rarely/sometimes	Not at all	Often times	Unsanitary	Yes
Female	5	>4	0	No	0	No	0	No	0	0	0	0	0	0	0	Often/always	Often times	Often times	Sanitary	Yes
Male	3	>=3 & <5	0	No	0	No	0	No	0	0	0	0	0	0	0	Often/always	Often times	Often times	Sanitary	Yes
Male	3	>=3 & <5	1	Yes	160	No	0	No	0	3840	2000-3999epg	0	0	0	0	Often/always	Sometimes	Often times	Sanitary	Yes
Female	3	>=3 & <5	0	No	0	No	0	No	0	0	0	0	0	0	0	Often/always	Sometimes	Sometimes	Sanitary	Yes
Male	5	>4	1	Yes	10	No	0	No	0	240	1-1999epg	0	0	0	0	Rarely/sometimes	Sometimes	Sometimes	Unsanitary	Yes
Female	3	>=3 & <5	0	No	0	No	0	No	0	0	0	0	0	0	0	Rarely/sometimes	Often times	Not at all	Sanitary	Yes
Female	5	>4	0	No	0	No	0	No	0	0	0	0	0	0	0	Rarely/sometimes	Often times	Sometimes	Sanitary	No
Male	2	>=1 &<3	0	No	0	No	0	No	0	0	0	0	0	0	0	Often/always	Sometimes	Sometimes	Sanitary	Yes
Female	2	>=1 &<3	0	No	0	No	0	No	0	0	0	0	0	0	0	Often/always	Often times	Sometimes	Sanitary	No
Male	5	>4	1	Yes	12	No	0	No	0	288	1-1999epg	0	0	0	0	Rarely/sometimes	Sometimes	Sometimes	Sanitary	No
Female	4	>=3 & <5	1	Yes	450	No	0	No	0	10800	>=4000epg	0	0	0	0	Rarely/sometimes	Often times	Sometimes	Sanitary	Yes
Female	1	>=1 &<3	1	No	0	Yes	165	No	0	0	0	3960	1-4999epg	0	0	Rarely/sometimes	Sometimes	Sometimes	Unsanitary	No
Male	4	>=3 & <5	1	No	0	Yes	50	No	0	0	0	1200	1-4999epg	0	0	Rarely/sometimes	Sometimes	Sometimes	Unsanitary	No
Male	4	>=3 & <5	0	No	0	No	0	No	0	0	0	0	0	0	0	Often/always	Sometimes	Often times	Sanitary	Yes
Female	4	>=3 & <5	0	No	0	No	0	No	0	0	0	0	0	0	0	Rarely/sometimes	Sometimes	Sometimes	Sanitary	Yes
Female	5	>4	0	No	0	No	0	No	0	0	0	0	0	0	0	Rarely/sometimes	Often times	Sometimes	Sanitary	Yes
Female	1	>=1 &<3	0	No	0	No	0	No	0	0	0	0	0	0	0	Rarely/sometimes	Often times	Not at all	Sanitary	Yes
Male	1	>=1 &<3	0	No	0	No	0	No	0	0	0	0	0	0	0	Rarely/sometimes	Sometimes	Often times	Sanitary	Yes
Female	5	>4	0	No	0	No	0	No	0	0	0	0	0	0	0	Often/always	Sometimes	Often times	Sanitary	No
Female	2	>=1 &<3	1	Yes	13	No	0	No	0	312	1-1999epg	0	0	0	0	Rarely/sometimes	Sometimes	Sometimes	Sanitary	Yes
Male	2	>=1 &<3	0	No	0	No	0	No	0	0	0	0	0	0	0	Often/always	Often times	Often times	Sanitary	Yes
Female	3	>=3 & <5	0	No	0	No	0	No	0	0	0	0	0	0	0	Rarely/sometimes	Sometimes	Often times	Sanitary	Yes
Male	3	>=3 & <5	0	No	0	No	0	No	0	0	0	0	0	0	0	Rarely/sometimes	Often times	Often times	Sanitary	Yes
Male	5	>4	1	Yes	550	No	0	No	0	13200	>=4000epg	0	0	0	0	Rarely/sometimes	Sometimes	Not at all	Sanitary	Yes
Female	2	>=1 &<3	0	No	0	No	0	No	0	0	0	0	0	0	0	Rarely/sometimes	Often times	Not at all	Sanitary	Yes
Male	4	>=3 & <5	1	No	0	Yes	22	No	0	0	0	528	1-4999epg	0	0	Rarely/sometimes	Sometimes	Sometimes	Sanitary	Yes
Female	3	>=3 & <5	0	No	0	No	0	No	0	0	0	0	0	0	0	Rarely/sometimes	Often times	Often times	Sanitary	No
Male	2	>=1 &<3	0	No	0	No	0	No	0	0	0	0	0	0	0	Rarely/sometimes	Often times	Often times	Sanitary	Yes
Male	4	>=3 & <5	0	No	0	No	0	No	0	0	0	0	0	0	0	Often/always	Sometimes	Sometimes	Sanitary	Yes
Female	3	>=3 & <5	0	No	0	No	0	No	0	0	0	0	0	0	0	Rarely/sometimes	Sometimes	Not at all	Sanitary	No
Male	1	>=1 &<3	0	No	0	No	0	No	0	0	0	0	0	0	0	Rarely/sometimes	Often times	Sometimes	Sanitary	No
Male	1	>=1 &<3	1	Yes	175	No	0	No	0	4200	>=4000epg	0	0	0	0	Rarely/sometimes	Sometimes	Often times	Unsanitary	Yes
Female	2	>=1 &<3	1	No	0	Yes	300	No	0	0	0	7200	5000-49,999epg	0	0	Rarely/sometimes	Sometimes	Sometimes	Sanitary	No
Female	2	>=1 &<3	0	No	0	No	0	No	0	0	0	0	0	0	0	Often/always	Often times	Sometimes	Unsanitary	No
Female	5	>4	0	No	0	No	0	No	0	0	0	0	0	0	0	Rarely/sometimes	Sometimes	Sometimes	Sanitary	Yes
Female	3	>=3 & <5	0	No	0	No	0	No	0	0	0	0	0	0	0	Often/always	Sometimes	Often times	Sanitary	No
Male	2	>=1 &<3	1	Yes	110	Yes	165	No	0	2640	2000-3999epg	3960	1-4999epg	0	0	Often/always	Sometimes	Sometimes	Unsanitary	No
Male	2	>=1 &<3	0	No	0	No	0	No	0	0	0	0	0	0	0	Often/always	Often times	Sometimes	Sanitary	No
Female	3	>=3 & <5	0	No	0	No	0	No	0	0	0	0	0	0	0	Often/always	Often times	Sometimes	Sanitary	Yes
Male	2	>=1 &<3	1	Yes	15	No	0	No	0	360	1-1999epg	0	0	0	0	Often/always	Sometimes	Sometimes	Sanitary	No
Male	4	>=3 & <5	0	No	0	No	0	No	0	0	0	0	0	0	0	Often/always	Sometimes	Sometimes	Sanitary	Yes
Female	1	>=1 &<3	0	No	0	No	0	No	0	0	0	0	0	0	0	Often/always	Sometimes	Often times	Sanitary	Yes
Male	1	>=1 &<3	1	Yes	90	No	0	No	0	2160	2000-3999epg	0	0	0	0	Rarely/sometimes	Sometimes	Sometimes	Sanitary	Yes
Female	4	>=3 & <5	0	No	0	No	0	No	0	0	0	0	0	0	0	Often/always	Sometimes	Sometimes	Sanitary	Yes
Male	3	>=3 & <5	1	No	0	Yes	75	No	0	0	0	1800	1-4999epg	0	0	Rarely/sometimes	Sometimes	Sometimes	Sanitary	Yes
Male	4	>=3 & <5	0	No	0	No	0	No	0	0	0	0	0	0	0	Often/always	Sometimes	Often times	Sanitary	Yes
Female	5	>4	1	Yes	15	No	0	No	0	360	1-1999epg	0	0	0	0	Often/always	Sometimes	Sometimes	Unsanitary	No
Male	2	>=1 &<3	0	No	0	No	0	No	0	0	0	0	0	0	0	Often/always	Often times	Sometimes	Sanitary	Yes
Female	2	>=1 &<3	0	No	0	No	0	No	0	0	0	0	0	0	0	Often/always	Often times	Often times	Sanitary	Yes
Female	3	>=3 & <5	0	No	0	No	0	No	0	0	0	0	0	0	0	Often/always	Sometimes	Sometimes	Sanitary	No
Male	4	>=3 & <5	1	Yes	7	No	0	No	0	168	1-1999epg	0	0	0	0	Rarely/sometimes	Sometimes	Sometimes	Sanitary	Yes
Female	4	>=3 & <5	0	No	0	No	0	No	0	0	0	0	0	0	0	Often/always	Sometimes	Not at all	Sanitary	Yes
Female	2	>=1 &<3	0	No	0	No	0	No	0	0	0	0	0	0	0	Often/always	Sometimes	Sometimes	Sanitary	Yes
Male	4	>=3 & <5	1	Yes	75	Yes	11	No	0	1800	1-1999epg	264	1-4999epg	0	0	Rarely/sometimes	Not at all	Often times	Sanitary	No
Female	5	>4	0	No	0	No	0	No	0	0	0	0	0	0	0	Often/always	Sometimes	Often times	Sanitary	Yes
Male	5	>4	0	No	0	No	0	No	0	0	0	0	0	0	0	Often/always	Often times	Often times	Sanitary	Yes
Male	4	>=3 & <5	0	No	0	No	0	No	0	0	0	0	0	0	0	Often/always	Often times	Sometimes	Sanitary	No
Female	5	>4	1	Yes	550	No	0	No	0	13200	>=4000epg	0	0	0	0	Often/always	Sometimes	Sometimes	Sanitary	Yes
Male	4	>=3 & <5	1	No	0	Yes	40	No	0	0	0	960	1-4999epg	0	0	Rarely/sometimes	Sometimes	Sometimes	Unsanitary	No
Female	3	>=3 & <5	1	Yes	25	No	0	No	0	600	1-1999epg	0	0	0	0	Rarely/sometimes	Sometimes	Sometimes	Sanitary	No
Female	5	>4	1	No	0	Yes	25	No	0	0	0	600	1-4999epg	0	0	Rarely/sometimes	Sometimes	Sometimes	Unsanitary	Yes
Male	1	>=1 &<3	0	No	0	No	0	No	0	0	0	0	0	0	0	Often/always	Often times	Often times	Sanitary	Yes
Female	1	>=1 &<3	0	No	0	No	0	No	0	0	0	0	0	0	0	Often/always	Often times	Often times	Sanitary	Yes
Female	4	>=3 & <5	0	No	0	No	0	No	0	0	0	0	0	0	0	Often/always	Often times	Sometimes	Sanitary	Yes
Female	1	>=1 &<3	0	No	0	No	0	No	0	0	0	0	0	0	0	Rarely/sometimes	Sometimes	Sometimes	Sanitary	Yes
Male	5	>4	1	Yes	77	No	0	No	0	1848	1-1999epg	0	0	0	0	Rarely/sometimes	Sometimes	Sometimes	Sanitary	Yes
Male	3	>=3 & <5	1	No	0	Yes	60	No	0	0	0	1440	1-4999epg	0	0	Often/always	Often times	Sometimes	Sanitary	Yes
Male	2	>=1 &<3	0	No	0	No	0	No	0	0	0	0	0	0	0	Often/always	Sometimes	Sometimes	Sanitary	No
Female	5	>4	0	No	0	No	0	No	0	0	0	0	0	0	0	Rarely/sometimes	Sometimes	Sometimes	Sanitary	Yes
Male	4	>=3 & <5	1	Yes	28	No	0	No	0	672	1-1999epg	0	0	0	0	Rarely/sometimes	Not at all	Often times	Sanitary	Yes
Female	5	>4	1	Yes	31	No	0	No	0	744	1-1999epg	0	0	0	0	Rarely/sometimes	Sometimes	Sometimes	Sanitary	Yes
Male	2	>=1 &<3	0	No	0	No	0	No	0	0	0	0	0	0	0	Rarely/sometimes	Often times	Often times	Sanitary	Yes
Male	5	>4	1	No	0	Yes	51	No	0	0	0	1224	1-4999epg	0	0	Rarely/sometimes	Sometimes	Sometimes	Sanitary	No
Male	1	>=1 &<3	0	No	0	No	0	No	0	0	0	0	0	0	0	Often/always	Often times	Sometimes	Sanitary	No
Male	4	>=3 & <5	0	No	0	No	0	No	0	0	0	0	0	0	0	Often/always	Sometimes	Often times	Sanitary	Yes
Male	3	>=3 & <5	0	No	0	No	0	No	0	0	0	0	0	0	0	Often/always	Not at all	Often times	Sanitary	Yes
Female	4	>=3 & <5	0	No	0	No	0	No	0	0	0	0	0	0	0	Often/always	Often times	Often times	Sanitary	Yes
Male	4	>=3 & <5	1	Yes	49	No	0	No	0	1176	1-1999epg	0	0	0	0	Rarely/sometimes	Sometimes	Not at all	Unsanitary	Yes
Female	5	>4	1	Yes	15	No	0	No	0	360	1-1999epg	0	0	0	0	Rarely/sometimes	Sometimes	Sometimes	Sanitary	Yes
Female	5	>4	0	No	0	No	0	No	0	0	0	0	0	0	0	Rarely/sometimes	Often times	Often times	Sanitary	Yes
Male	3	>=3 & <5	0	No	0	No	0	No	0	0	0	0	0	0	0	Rarely/sometimes	Often times	Sometimes	Sanitary	Yes
Male	3	>=3 & <5	0	No	0	No	0	No	0	0	0	0	0	0	0	Rarely/sometimes	Often times	Often times	Sanitary	Yes
Female	3	>=3 & <5	1	Yes	55	No	0	No	0	1320	1-1999epg	0	0	0	0	Rarely/sometimes	Often times	Not at all	Sanitary	Yes
Male	3	>=3 & <5	0	No	0	No	0	No	0	0	0	0	0	0	0	Rarely/sometimes	Sometimes	Often times	Sanitary	Yes
Female	5	>4	0	No	0	No	0	No	0	0	0	0	0	0	0	Rarely/sometimes	Often times	Sometimes	Unsanitary	Yes
Female	1	>=1 &<3	0	No	0	No	0	No	0	0	0	0	0	0	0	Rarely/sometimes	Often times	Sometimes	Unsanitary	No
Female	4	>=3 & <5	1	No	0	Yes	54	No	0	0	0	1296	1-4999epg	0	0	Rarely/sometimes	Sometimes	Often times	Sanitary	Yes
Female	4	>=3 & <5	0	No	0	No	0	No	0	0	0	0	0	0	0	Rarely/sometimes	Often times	Sometimes	Sanitary	No
Female	3	>=3 & <5	1	Yes	140	No	0	No	0	3360	2000-3999epg	0	0	0	0	Often/always	Often times	Sometimes	Sanitary	No
Male	1	>=1 &<3	0	No	0	No	0	No	0	0	0	0	0	0	0	Rarely/sometimes	Often times	Often times	Unsanitary	Yes
Female	2	>=1 &<3	0	No	0	No	0	No	0	0	0	0	0	0	0	Rarely/sometimes	Often times	Often times	Sanitary	No
Male	3	>=3 & <5	0	No	0	No	0	No	0	0	0	0	0	0	0	Rarely/sometimes	Sometimes	Sometimes	Sanitary	Yes
Male	5	>4	0	No	0	No	0	No	0	0	0	0	0	0	0	Rarely/sometimes	Sometimes	Sometimes	Sanitary	Yes
Male	5	>4	0	No	0	No	0	No	0	0	0	0	0	0	0	Rarely/sometimes	Not at all	Sometimes	Sanitary	Yes
Male	4	>=3 & <5	1	Yes	60	No	0	No	0	1440	1-1999epg	0	0	0	0	Rarely/sometimes	Not at all	Sometimes	Unsanitary	Yes
Male	5	>4	1	No	0	Yes	17	No	0	0	0	408	1-4999epg	0	0	Rarely/sometimes	Sometimes	Sometimes	Sanitary	Yes
Female	1	>=1 &<3	0	No	0	No	0	No	0	0	0	0	0	0	0	Rarely/sometimes	Often times	Sometimes	Sanitary	Yes
Female	3	>=3 & <5	0	No	0	No	0	No	0	0	0	0	0	0	0	Rarely/sometimes	Often times	Sometimes	Sanitary	No
Female	2	>=1 &<3	0	No	0	No	0	No	0	0	0	0	0	0	0	Often/always	Sometimes	Often times	Sanitary	Yes
Male	3	>=3 & <5	0	No	0	No	0	No	0	0	0	0	0	0	0	Often/always	Often times	Often times	Unsanitary	Yes
Male	4	>=3 & <5	1	Yes	9	Yes	120	No	0	216	1-1999epg	2880	1-4999epg	0	0	Often/always	Sometimes	Sometimes	Unsanitary	No
Female	2	>=1 &<3	0	No	0	No	0	No	0	0	0	0	0	0	0	Often/always	Often times	Sometimes	Sanitary	Yes
Male	2	>=1 &<3	0	No	0	No	0	No	0	0	0	0	0	0	0	Often/always	Not at all	Sometimes	Sanitary	Yes
Male	3	>=3 & <5	0	No	0	No	0	No	0	0	0	0	0	0	0	Often/always	Often times	Sometimes	Sanitary	Yes
Female	1	>=1 &<3	0	No	0	No	0	No	0	0	0	0	0	0	0	Often/always	Sometimes	Sometimes	Sanitary	No
Female	3	>=3 & <5	0	No	0	No	0	No	0	0	0	0	0	0	0	Often/always	Often times	Often times	Sanitary	Yes
Female	3	>=3 & <5	0	No	0	No	0	No	0	0	0	0	0	0	0	Often/always	Often times	Not at all	Sanitary	Yes
Female	4	>=3 & <5	0	No	0	No	0	No	0	0	0	0	0	0	0	Often/always	Not at all	Sometimes	Sanitary	Yes
Female	2	>=1 &<3	1	Yes	35	No	0	No	0	840	1-1999epg	0	0	0	0	Rarely/sometimes	Sometimes	Sometimes	Sanitary	Yes
Female	1	>=1 &<3	0	No	0	No	0	No	0	0	0	0	0	0	0	Often/always	Often times	Sometimes	Sanitary	No
Female	5	>4	0	No	0	No	0	No	0	0	0	0	0	0	0	Often/always	Sometimes	Sometimes	Sanitary	Yes
Female	2	>=1 &<3	0	No	0	No	0	No	0	0	0	0	0	0	0	Often/always	Sometimes	Sometimes	Sanitary	Yes
Female	4	>=3 & <5	1	Yes	14	No	0	No	0	336	1-1999epg	0	0	0	0	Rarely/sometimes	Often times	Often times	Unsanitary	No
Female	1	>=1 &<3	0	No	0	No	0	No	0	0	0	0	0	0	0	Rarely/sometimes	Often times	Sometimes	Sanitary	Yes
Female	2	>=1 &<3	1	No	0	Yes	21	No	0	0	0	504	1-4999epg	0	0	Rarely/sometimes	Not at all	Sometimes	Unsanitary	Yes
Male	3	>=3 & <5	0	No	0	No	0	No	0	0	0	0	0	0	0	Often/always	Often times	Sometimes	Sanitary	Yes
Female	3	>=3 & <5	1	Yes	77	No	0	No	0	1848	1-1999epg	0	0	0	0	Rarely/sometimes	Sometimes	Sometimes	Sanitary	Yes
Male	5	>4	1	Yes	27	Yes	17	No	0	648	1-1999epg	408	1-4999epg	0	0	Often/always	Sometimes	Sometimes	Sanitary	Yes
Female	5	>4	0	No	0	No	0	No	0	0	0	0	0	0	0	Often/always	Often times	Sometimes	Sanitary	Yes
Male	3	>=3 & <5	0	No	0	No	0	No	0	0	0	0	0	0	0	Often/always	Often times	Sometimes	Sanitary	Yes
Female	5	>4	0	No	0	No	0	No	0	0	0	0	0	0	0	Rarely/sometimes	Sometimes	Sometimes	Sanitary	Yes
Male	5	>4	0	No	0	No	0	No	0	0	0	0	0	0	0	Often/always	Not at all	Often times	Sanitary	Yes
Male	5	>4	1	Yes	75	No	0	No	0	1800	1-1999epg	0	0	0	0	Often/always	Sometimes	Not at all	Sanitary	Yes
Male	3	>=3 & <5	0	No	0	No	0	No	0	0	0	0	0	0	0	Rarely/sometimes	Often times	Sometimes	Sanitary	Yes
Female	2	>=1 &<3	0	No	0	No	0	No	0	0	0	0	0	0	0	Often/always	Often times	Sometimes	Sanitary	No
Male	3	>=3 & <5	0	No	0	No	0	No	0	0	0	0	0	0	0	Rarely/sometimes	Often times	Sometimes	Sanitary	Yes
Male	4	>=3 & <5	1	Yes	140	No	0	No	0	3360	2000-3999epg	0	0	0	0	Rarely/sometimes	Sometimes	Sometimes	Unsanitary	No
Female	3	>=3 & <5	1	No	0	Yes	80	No	0	0	0	1920	1-4999epg	0	0	Rarely/sometimes	Sometimes	Sometimes	Unsanitary	No
Male	4	>=3 & <5	0	No	0	No	0	No	0	0	0	0	0	0	0	Rarely/sometimes	Often times	Sometimes	Sanitary	Yes
Female	4	>=3 & <5	1	No	0	Yes	140	No	0	0	0	3360	1-4999epg	0	0	Rarely/sometimes	Often times	Sometimes	Sanitary	Yes
Female	5	>4	0	No	0	No	0	No	0	0	0	0	0	0	0	Rarely/sometimes	Sometimes	Sometimes	Sanitary	Yes
Female	3	>=3 & <5	0	No	0	No	0	No	0	0	0	0	0	0	0	Rarely/sometimes	Often times	Often times	Sanitary	No
Male	2	>=1 &<3	1	Yes	15	No	0	No	0	360	1-1999epg	0	0	0	0	Rarely/sometimes	Sometimes	Sometimes	Sanitary	Yes
Female	5	>4	0	No	0	No	0	No	0	0	0	0	0	0	0	Often/always	Often times	Often times	Sanitary	Yes
Female	2	>=1 &<3	0	No	0	No	0	No	0	0	0	0	0	0	0	Rarely/sometimes	Often times	Often times	Sanitary	Yes
Female	4	>=3 & <5	1	No	0	Yes	17	No	0	0	0	408	1-4999epg	0	0	Often/always	Sometimes	Often times	Sanitary	Yes
Male	4	>=3 & <5	0	No	0	No	0	No	0	0	0	0	0	0	0	Often/always	Often times	Often times	Sanitary	Yes
Male	2	>=1 &<3	1	Yes	29	Yes	60	No	0	696	1-1999epg	1440	1-4999epg	0	0	Rarely/sometimes	Often times	Sometimes	Sanitary	Yes
Female	3	>=3 & <5	0	No	0	No	0	No	0	0	0	0	0	0	0	Often/always	Often times	Often times	Sanitary	Yes
Female	4	>=3 & <5	0	No	0	No	0	No	0	0	0	0	0	0	0	Often/always	Often times	Often times	Sanitary	Yes
Female	2	>=1 &<3	0	No	0	No	0	No	0	0	0	0	0	0	0	Often/always	Not at all	Not at all	Sanitary	Yes
Male	1	>=1 &<3	0	No	0	No	0	No	0	0	0	0	0	0	0	Often/always	Often times	Often times	Sanitary	Yes
Male	3	>=3 & <5	0	No	0	No	0	No	0	0	0	0	0	0	0	Rarely/sometimes	Sometimes	Often times	Sanitary	Yes
Male	1	>=1 &<3	0	No	0	No	0	No	0	0	0	0	0	0	0	Often/always	Sometimes	Often times	Sanitary	Yes
Female	3	>=3 & <5	0	No	0	No	0	No	0	0	0	0	0	0	0	Often/always	Often times	Not at all	Sanitary	Yes
Male	5	>4	1	Yes	120	No	0	No	0	2880	2000-3999epg	0	0	0	0	Rarely/sometimes	Sometimes	Often times	Unsanitary	Yes
Male	5	>4	0	No	0	No	0	No	0	0	0	0	0	0	0	Often/always	Sometimes	Often times	Sanitary	No
Male	1	>=1 &<3	0	No	0	No	0	No	0	0	0	0	0	0	0	Often/always	Not at all	Often times	Unsanitary	No
Male	3	>=3 & <5	0	No	0	No	0	No	0	0	0	0	0	0	0	Often/always	Often times	Often times	Sanitary	Yes
Male	5	>4	0	No	0	No	0	No	0	0	0	0	0	0	0	Often/always	Often times	Often times	Sanitary	Yes
Male	3	>=3 & <5	0	No	0	No	0	No	0	0	0	0	0	0	0	Often/always	Often times	Sometimes	Sanitary	Yes
Male	5	>4	1	Yes	45	Yes	100	No	0	1080	1-1999epg	2400	1-4999epg	0	0	Often/always	Often times	Sometimes	Sanitary	Yes
Female	5	>4	1	Yes	160	No	0	No	0	3840	2000-3999epg	0	0	0	0	Rarely/sometimes	Sometimes	Often times	Sanitary	No
Male	4	>=3 & <5	0	No	0	No	0	No	0	0	0	0	0	0	0	Often/always	Often times	Often times	Sanitary	No
Male	3	>=3 & <5	0	No	0	No	0	No	0	0	0	0	0	0	0	Often/always	Often times	Often times	Unsanitary	Yes
Male	1	>=1 &<3	1	No	0	No	0	Yes	80	0	0	0	0	1920	1000-9999epg	Rarely/sometimes	Often times	Sometimes	Sanitary	Yes
Male	1	>=1 &<3	0	No	0	No	0	No	0	0	0	0	0	0	0	Rarely/sometimes	Sometimes	Sometimes	Sanitary	Yes
Male	5	>4	0	No	0	No	0	No	0	0	0	0	0	0	0	Often/always	Not at all	Often times	Sanitary	Yes
Male	2	>=1 &<3	0	No	0	No	0	No	0	0	0	0	0	0	0	Rarely/sometimes	Sometimes	Often times	Unsanitary	Yes
Male	1	>=1 &<3	1	No	0	Yes	11	No	0	0	1-1999epg	264	1-4999epg	0	0	Often/always	Often times	Not at all	Sanitary	Yes
Male	3	>=3 & <5	0	No	0	No	0	No	0	0	0	0	0	0	0	Often/always	Often times	Sometimes	Sanitary	Yes
Female	3	>=3 & <5	0	No	0	No	0	No	0	0	0	0	0	0	0	Often/always	Sometimes	Often times	Unsanitary	Yes
Male	5	>4	1	Yes	160	No	0	No	0	3840	2000-3999epg	0	0	0	0	Rarely/sometimes	Sometimes	Often times	Sanitary	No
Female	4	>=3 & <5	1	No	0	Yes	45	No	0	0	0	1080	1-4999epg	0	0	Rarely/sometimes	Sometimes	Sometimes	Sanitary	Yes
Female	1	>=1 &<3	0	No	0	No	0	No	0	0	0	0	0	0	0	Often/always	Sometimes	Often times	Unsanitary	Yes
Male	2	>=1 &<3	0	No	0	No	0	No	0	0	0	0	0	0	0	Often/always	Not at all	Often times	Sanitary	No
Male	3	>=3 & <5	1	Yes	140	No	0	No	0	3360	2000-3999epg	0	1-4999epg	0	0	Rarely/sometimes	Sometimes	Not at all	Sanitary	Yes
Male	5	>4	0	No	0	No	0	No	0	0	0	0	0	0	0	Often/always	Often times	Often times	Sanitary	No
Female	3	>=3 & <5	0	No	0	No	0	No	0	0	0	0	0	0	0	Often/always	Often times	Often times	Sanitary	Yes
Male	3	>=3 & <5	0	No	0	No	0	No	0	0	0	0	0	0	0	Often/always	Sometimes	Often times	Sanitary	Yes
Male	5	>4	0	No	0	No	0	No	0	0	0	0	0	0	0	Often/always	Often times	Often times	Unsanitary	No
Male	2	>=1 &<3	1	Yes	50	No	0	No	0	1200	1-1999epg	0	0	0	0	Rarely/sometimes	Not at all	Sometimes	Unsanitary	No
Male	5	>4	1	No	0	Yes	55	No	0	0	0	1320	1-4999epg	0	0	Rarely/sometimes	Sometimes	Often times	Unsanitary	No
Male	1	>=1 &<3	0	No	0	No	0	No	0	0	0	0	0	0	0	Often/always	Sometimes	Often times	Sanitary	No
Female	3	>=3 & <5	0	No	0	No	0	No	0	0	0	0	0	0	0	Often/always	Often times	Sometimes	Sanitary	Yes
Male	3	>=3 & <5	0	No	0	No	0	No	0	0	0	0	0	0	0	Often/always	Often times	Often times	Sanitary	Yes
Female	4	>=3 & <5	0	No	0	No	0	No	0	0	0	0	0	0	0	Rarely/sometimes	Often times	Often times	Unsanitary	No
Female	4	>=3 & <5	0	No	0	No	0	No	0	0	0	0	0	0	0	Rarely/sometimes	Sometimes	Often times	Unsanitary	Yes
Female	5	>4	1	Yes	45	No	0	No	0	1080	1-1999epg	0	0	0	0	Rarely/sometimes	Often times	Sometimes	Unsanitary	Yes
Male	4	>=3 & <5	1	No	0	Yes	59	No	0	0	0	1416	1-4999epg	0	0	Often/always	Often times	Often times	Unsanitary	No
Male	5	>4	0	No	0	No	0	No	0	0	0	0	0	0	0	Often/always	Often times	Often times	Unsanitary	No
Male	3	>=3 & <5	0	No	0	No	0	No	0	0	0	0	0	0	0	Often/always	Often times	Often times	Unsanitary	Yes
Male	2	>=1 &<3	0	No	0	No	0	No	0	0	0	0	0	0	0	Rarely/sometimes	Often times	Not at all	Unsanitary	No
Male	5	>4	0	No	0	No	0	No	0	0	0	0	0	0	0	Rarely/sometimes	Often times	Often times	Unsanitary	Yes
Male	1	>=1 &<3	1	Yes	105	No	0	No	0	2520	2000-3999epg	0	0	0	0	Rarely/sometimes	Sometimes	Sometimes	Unsanitary	No
Female	5	>4	1	Yes	200	No	0	No	0	4800	>=4000epg	0	0	0	0	Often/always	Sometimes	Often times	Unsanitary	No
Female	3	>=3 & <5	0	No	0	No	0	No	0	0	0	0	0	0	0	Often/always	Not at all	Not at all	Sanitary	Yes
